# Supplementary material
Source: HighWire-hosted journal article supplement (https://jnm.snmjournals.org/highwire/filestream/94595/field_highwire_adjunct_files/0/135855_Supplemental_Data.pdf)
Supplement: 135855_Supplemental_Data.pdf [file 135855_Supplemental_Data.pdf]

**SUPPLEMENTAL TABLE 1:** Additional baseline patient characteristics for each study included in the meta-analysis.

| Study                                                          |               | 1              | 2                                      | 3            | 4    | 5    | 6               | 7            | 8             | 9    | 10   | 11             | 12    |
|----------------------------------------------------------------|---------------|----------------|----------------------------------------|--------------|------|------|-----------------|--------------|---------------|------|------|----------------|-------|
| Study Year                                                     |               | 2008           | 2011                                   | 2011         | 2007 | 2010 | 2008            | 2008         | 2010          | 2012 | 2011 | 2008           | 2013  |
| Number of Procedures with Response Assessment                  |               | 168            | 40                                     | 10           | 33   | 51   | 9               | 16           | 48            | 23   | 10   | 8              | 19    |
| Mean Age (Years)                                               |               | 58*            | 62                                     | 53*          | 61   | 61   | 59*             | 61           | 60            | 58   | 49   | 56*            | 62.5* |
| Female Patients                                                |               | 51%            | 29%                                    | 54%          | 35%  | 33%  | 78%             | 50%          | 40%           | N/A  | 50%  | 37%            | 39%   |
| Male Patients                                                  |               | 49%            | 71%                                    | 46%          | 65%  | 67%  | 22%             | 50%          | 60%           | N/A  | 50%  | 63%            | 61%   |
| Mean Lab Values Prior to Treatment                             | Albumin (g/L) | N/A            | 72* <sup>†</sup><br>(7.2) <sup>‡</sup> | N/A          | N/A  | N/A  | N/A             | 39<br>(3.9)  | 38<br>(3.8)   | N/A  | N/A  | 37<br>(3.7)    | N/A   |
|                                                                | AP (μkat/L)   | N/A            | 2.5*<br>(152)                          | N/A          | N/A  | N/A  | N/A             | 3.3<br>(197) | 2.2<br>(131)  | N/A  | N/A  | 4.1<br>(248)   | N/A   |
|                                                                | AST(μkat/L)   | N/A            | 0.57*<br>(34)                          | 1.5<br>(91)  | N/A  | N/A  | N/A             | 0.65<br>(39) | 0.63<br>(38)  | N/A  | N/A  | 0.91<br>(54.5) | N/A   |
|                                                                | ALT(μkat/L)   | N/A            | 0.55*<br>(33)                          | 0.68<br>(41) | N/A  | N/A  | N/A             | 0.75<br>(45) | 0.82<br>(49)  | N/A  | N/A  | (0.62)<br>37   | N/A   |
|                                                                | TB (μmol/L)   | N/A            | 10.3*<br>(0.6)                         | 8.6<br>(0.5) | N/A  | N/A  | N/A             | 12<br>(0.7)  | 18.8<br>(1.1) | N/A  | N/A  | 6.8<br>(0.4)   | N/A   |
|                                                                | GGT (μkat/L)  | N/A            | 2.6*<br>(158)                          | N/A          | N/A  | N/A  | N/A             | N/A          | N/A           | N/A  | N/A  | N/A            | N/A   |
| Mean Time Elapsed from NET Diagnosis to Y90 Treatment (Months) |               | N/A            | 27.4*                                  | N/A          | 55.9 | 34.9 | 59 <sup>§</sup> | N/A          | N/A           | N/A  | 30%  | N/A            | N/A   |
| ECOG Score                                                     | 0             | Median ECOG: 0 | 74%                                    | N/A          | N/A  | 68%  | N/A             | N/A          | 50%           | 79%  | N/A  | N/A            | N/A   |
|                                                                | 1             |                | 17%                                    | N/A          | N/A  | 24%  | N/A             | N/A          | 25%           |      | N/A  | N/A            | N/A   |
|                                                                | 2             |                | 9%                                     | N/A          | N/A  | 6%   | N/A             | N/A          | 4%            | 21%  | N/A  | N/A            | N/A   |
|                                                                | 3             |                | 0%                                     | N/A          | N/A  | 2%   | N/A             |              | 0%            | 0%   | N/A  | N/A            | N/A   |

\*These studies reported the value as a median.

<sup>†</sup>This study reported the albumin level as whole protein.

<sup>‡</sup>The units in parentheses are in grams/deciliter for albumin, units/liter for AP, AST, ALT, and GGT and milligrams/deciliter for TB.

<sup>§</sup>Unclear if time elapsed since primary neuroendocrine tumor or neuroendocrine liver metastases diagnosis.

ECOG unknown in 21% of patients.

1: Kennedy; 2: Paprottka; 3: Lacin; 4 :King; 5: Cao; 6: Kalinowski; 7: Rhee; 8: Saxena; 9: Ezzidin; 10: Arslan; 11: Murthy; 12: Ozao-Choy; N/A: Not available; g/L: grams/liter; AP: Alkaline phosphatase; μkat/L: microkatal/liter; AST: Aspartate aminotransferase; ALT: Alanine aminotransferase; TB: Total bilirubin; μmol/L: micromole/liter; GGT: Gamma glutamyl transferase; NET: Neuroendocrine tumor; Y90: Yttrium-90; ECOG: Eastern Cooperative Oncology Group

**SUPPLEMENTAL TABLE 2:** Overview of the current literature.

| Author (year)          | Study design  | Treatment                                                    | N                    | L    | RA Criteria | CR                | PR    | MS                |
|------------------------|---------------|--------------------------------------------------------------|----------------------|------|-------------|-------------------|-------|-------------------|
| Rinke (2009)(1)        | RCT           | Octreotide                                                   | 42                   | 83%  | WHO         | 0%                | 2.4%  | N/R               |
|                        |               | Placebo                                                      | 43                   | 88%  |             | 0%                | 2.3%  | 73.7 <sup>*</sup> |
| Arnold (2005)(2)       | RCT           | Octreotide                                                   | 51                   | N/A  | >50%        | 0%                | 1%    | 35                |
|                        |               | Octreotide + Interferon                                      | 54                   |      |             | 0%                | 1.9%  | 51                |
| Ramanathan (2001)(3)   | Prospective   | Dacarbazin                                                   | 52 (50) <sup>‡</sup> | N/A  | >50%        | 8%                | 26%   | 19.3              |
| Iwasa (2010)(4)        | Retrospective | Cisplatin + Etoposide (PDNET)                                | 21                   | 81%  | RECIST      | 0%                | 14.3% | 5.8               |
| Mitry (1999)(5)        | Retrospective | Cisplatin + Etoposide (WDNET)                                | 12                   | N/A  | WHO         | 0%                | 9%    | 17.6              |
|                        |               | Cisplatin + Etoposide (PDNET)                                | 41                   |      |             | 9.8%              | 31.7% | 15                |
| Turner (2010)(6)       | Prospective   | 5-FU + Cisplatin + Streptozocin                              | 82                   | 76%  | RECIST      | 0%                | 32.9% | 31.5              |
| Olsen (2012)(7)        | Prospective   | Temozolomide (PDNET)                                         | 28                   | 86%  | RECIST      | 0%                | 0%    | 3.5               |
| Fine (2013)(8)         | Retrospective | CAPTEM (WDNET)                                               | 18                   | 100% | RECIST      | 5.6%              | 55.6% | 83 <sup>*</sup>   |
| Strosberg (2011)(9)    | Retrospective | CAPTEM (WDNET)                                               | 30                   | NA   | RECIST      | 0%                | 70%   | N/R               |
| Pavel (2011)(10)       | RCT           | Placebo + Octreotide                                         | 213                  | 92%  | RECIST      | 0%                | 1.9%  | N/A               |
|                        |               | Everolimus + Octreotide                                      | 216                  | 92%  |             | 0%                | 2.3%  |                   |
| Yao (2010)(11)         | Prospective   | Everolimus                                                   | 115                  | 95%  | RECIST      | 0%                | 9.6%  | 24.9              |
|                        |               | Everolimus + Octreotide                                      | 45                   | 93%  | RECIST      | 0%                | 4.4%  | N/R               |
| Raymond (2011)(12)     | RCT           | Placebo                                                      | 85                   | 94%  | RECIST      | 0%                | 0%    | N/R               |
|                        |               | Sunitinib                                                    | 86                   | 95%  |             | 2.3%              | 7%    | N/R               |
| Imhof (2011)(13)       | Prospective   | <sup>90</sup> Y-DOTA-TOC                                     | 1109                 | N/A  | N/A         | 0.6% <sup>‡</sup> | N/A   | 94.6 <sup>*</sup> |
| Villard (2012)(14)     | Prospective   | <sup>90</sup> Y-DOTA-TOC                                     | 237                  | 88%  | RECIST      | 3.4%              | 16%   | 47.5              |
|                        |               | <sup>90</sup> Y-DOTA-TOC + <sup>177</sup> Lu-DOTA-TOC        | 249                  | 76%  |             | 2.2%              | 20.9% | 66.1              |
| Kwekkeboom (2008)(15)  | Retrospective | <sup>177</sup> Lu-DOTA-TATE                                  | 310                  | 89%  | SWOG        | 1.6%              | 27.7% | 46                |
| Claringbold (2012)(16) | Prospective   | <sup>177</sup> Lu-DOTA-TATE + CAPTEM                         | 34                   | 94%  | RECIST      | 14.7%             | 38.2% | N/R               |
| Berber (2002)(17)      | Prospective   | RFA                                                          | 34                   | 100% | N/A         | N/A               | N/A   | 19.2 <sup>§</sup> |
| Gillams (2005)(18)     | Prospective   | Laser thermal ablation or RFA                                | 25                   | 100% | N/A         | N/A               | N/A   | 29                |
| Strosberg (2005)(19)   | Retrospective | TAE                                                          | 84 (23) <sup>‡</sup> | 100% | RECIST      | 0%                | 47.8% | 36                |
| Ruutiainen (2007)(20)  | Retrospective | TAE                                                          | 23                   | 100% | RECIST      | 0%                | 50%   | 39                |
|                        |               | TACE                                                         | 44                   |      |             | 0%                | 66%   | 44                |
| Dong (2011)(21)        | Retrospective | TACE                                                         | 123                  | 100% | RECIST      | 0%                | 61.8% | 65.6 <sup>§</sup> |
| Strosberg (2012)(22)   | Prospective   | TAE directly followed by Sunitinib                           | 39                   | 100% | RECIST      | 0%                | 72%   | N/R               |
| Kratochwil (2011)(23)  | Prospective   | Transarterial <sup>90</sup> Y- or <sup>177</sup> Lu-DOTA-TOC | 15                   | 100% | RECIST      | 6.7%              | 53.3% | N/A               |
| Limouris (2008)(24)    | Prospective   | Transarterial <sup>111</sup> In-pentetreotide                | 17                   | 100% | RECIST      | 5.9%              | 47.1% | 32                |

\*Months since diagnosis.

‡Number of patients available for response assessment.

‡Own definition of response: CR: Disappearance of all lesions; (PR not well defined)

§Mean survival

N: Number of patients; L: Liver involvement; RA: Response assessment; CR: Complete response; PR: Partial response; MS: Median survival (months); N/R: Not reached in study; N/A: Not available; >50%: More than 50% decrease in tumor size; PDNET: poorly differentiated neuroendocrine tumor; WDNET: well differentiated neuroendocrine tumor; CAPTEM: capecitabine and temozolomide

## SUPPLEMENTAL REFERENCES

1. Rinke A, Muller HH, Schade-Brittinger C, et al. Placebo-controlled, double-blind, prospective, randomized study on the effect of octreotide LAR in the control of tumor growth in patients with metastatic neuroendocrine midgut tumors: a report from the PROMID study group. *J Clin Oncol.* 2009;27:4656-4663.
2. Arnold R, Rinke A, Klose KJ, et al. Octreotide versus octreotide plus interferon-alpha in endocrine gastroenteropancreatic tumors: a randomized trial. *Clin Gastroenterol Hepatol.* 2005;3:761-771.
3. Ramanathan RK, Cnaan A, Hahn RG, et al. Phase II trial of dacarbazine (DTIC) in advanced pancreatic islet cell carcinoma. Study of the Eastern Cooperative Oncology Group-E6282. *Ann Oncol.* 2001;12:1139-1143.
4. Iwasa S, Morizane C, Okusaka T, et al. Cisplatin and etoposide as first-line chemotherapy for poorly differentiated neuroendocrine carcinoma of the hepatobiliary tract and pancreas. *Jpn J Clin Oncol.* 2010;40:313-318.
5. Mitry E, Baudin E, Ducreux M, et al. Treatment of poorly differentiated neuroendocrine tumours with etoposide and cisplatin. *Br J Cancer.* 1999;81:1351-1355.
6. Turner NC, Strauss SJ, Sarker D, et al. Chemotherapy with 5-fluorouracil, cisplatin and streptozocin for neuroendocrine tumours. *Br J Cancer.* 2010;102:1106-1112.
7. Olsen IH, Sorensen JB, Federspiel B, et al. Temozolomide as second or third line treatment of patients with neuroendocrine carcinomas. *Scientific World Journal.* 2012;170496:4 pages.
8. Fine RL, Gulati AP, Krantz BA, et al. Capecitabine and temozolomide (CAPTEM) for metastatic, well-differentiated neuroendocrine cancers: the pancreas center at Columbia university experience. *Cancer Chemother Pharmacol.* 2013;71:663-670.

9. Strosberg JR, Fine RL, Choi J, et al. First-line chemotherapy with capecitabine and temozolomide in patients with metastatic pancreatic endocrine carcinomas. *Cancer*. 2011;117:268-275.
10. Pavel ME, Hainsworth JD, Baudin E, et al. Everolimus plus octreotide long-acting repeatable for the treatment of advanced neuroendocrine tumours associated with carcinoid syndrome (RADIANT-2): a randomised, placebo-controlled, phase 3 study. *Lancet*. 2011;378:2005-2012.
11. Yao JC, Lombard-Bohas C, Baudin E, et al. Daily oral everolimus activity in patients with metastatic pancreatic neuroendocrine tumors after failure of cytotoxic chemotherapy: a phase II trial. *J Clin Oncol*. 2010;28:69-76.
12. Raymond E, Dahan L, Raoul JL, et al. Sunitinib malate for the treatment of pancreatic neuroendocrine tumors. *N Engl J Med*. 2011;364:501-513.
13. Imhof A, Brunner P, Marincek N, et al. Response, survival, and long-term toxicity after therapy with the radiolabeled somatostatin analogue [90Y-DOTA]-TOC in metastasized neuroendocrine cancers. *J Clin Oncol*. 2011;29:2416-2423.
14. Villard L, Romer A, Marincek N, et al. Cohort study of somatostatin-based radiopeptide therapy with [(90)Y-DOTA]-TOC versus [(90)Y-DOTA]-TOC plus [(177)Lu-DOTA]-TOC in neuroendocrine cancers. *J Clin Oncol*. 2012;30:1100-1106.
15. Kwekkeboom DJ, de Herder WW, Kam BL, et al. Treatment with the radiolabeled somatostatin analog [177 Lu-DOTA 0,Tyr3]octreotate: toxicity, efficacy, and survival. *J Clin Oncol*. 2008;26:2124-2130.
16. Claringbold PG, Price RA, Turner JH. Phase I-II study of radiopeptide 177Lu-octreotate in combination with capecitabine and temozolomide in advanced low-grade

neuroendocrine tumors. *Cancer Biother Radiopharm.* 2012;27:561-569.

17. Berber E, Flesher N, Siperstein AE. Laparoscopic radiofrequency ablation of neuroendocrine liver metastases. *World J Surg.* 2002;26:985-990.
18. Gillams A, Cassoni A, Conway G, et al. Radiofrequency ablation of neuroendocrine liver metastases: the Middlesex experience. *Abdom Imaging.* 2005;30:435-441.
19. Strosberg JR, Choi J, Cantor AB, et al. Selective hepatic artery embolization for treatment of patients with metastatic carcinoid and pancreatic endocrine tumors. *Cancer Control.* 2006;13:72-78.
20. Ruutiainen AT, Soulen MC, Tuite CM, et al. Chemoembolization and bland embolization of neuroendocrine tumor metastases to the liver. *J Vasc Interv Radiol.* 2007;18:847-855.
21. Dong XD, Carr BI. Hepatic artery chemoembolization for the treatment of liver metastases from neuroendocrine tumors: a long-term follow-up in 123 patients. *Med Oncol.* 2011;28:S286-290.
22. Strosberg JR, Weber JM, Choi J, et al. A phase II clinical trial of sunitinib following hepatic transarterial embolization for metastatic neuroendocrine tumors. *Ann Oncol.* 2012;23:2335-2341.
23. Kratochwil C, Lopez-Benitez R, Mier W, et al. Hepatic arterial infusion enhances DOTATOC radiopeptide therapy in patients with neuroendocrine liver metastases. *Endocr Relat Cancer.* 2011;18:595-602.
24. Limouris GS, Chatziioannou A, Kontogeorgakos D, et al. Selective hepatic arterial infusion of In-111-DTPA-Phe1-octreotide in neuroendocrine liver metastases. *Eur J Nucl Med Mol Imaging.* 2008;35:1827-1837.
